# Supplementary material for: NIR organic dyes based on phenazine-cyanine for photoacoustic imaging-guided photothermal therapy
Source: Royal Society of Chemistry journal article supplement (doi:10.1039/c8tb01750f), 2018-01-01
Supplement: c8tb01750f1.pdf [file c8tb01750f1.pdf]

## **NIR Organic Dyes based on Phenazine-cyanine for Photoacoustic Imaging-guided Photothermal Therapy**

Yongchao Yan,<sup>a</sup> Jiawen Chen,<sup>b</sup> Zhijuan Yang,<sup>b</sup> Xiao Zhang,<sup>a</sup> Zhuang Liu, <sup>\*b</sup> Jianli Hua<sup>\*a</sup>

<sup>a</sup> Key Laboratory for Advanced Materials and School of Chemistry and Molecular Engineering,  
East China University of Science and Technology, 130 Meilong Rd., Shanghai 200237, China.

\*E-mail: [jlhua@ecust.edu.cn](mailto:jlhua@ecust.edu.cn)

<sup>b</sup> Institute of Functional Nano & Soft Materials (FUNSOM), Jiangsu Key Laboratory for  
Carbon-Based Functional Materials & Devices, Soochow University, Suzhou 215123, China.

\*E-mail: [zliu@suda.edu.cn](mailto:zliu@suda.edu.cn)

## Supporting Information

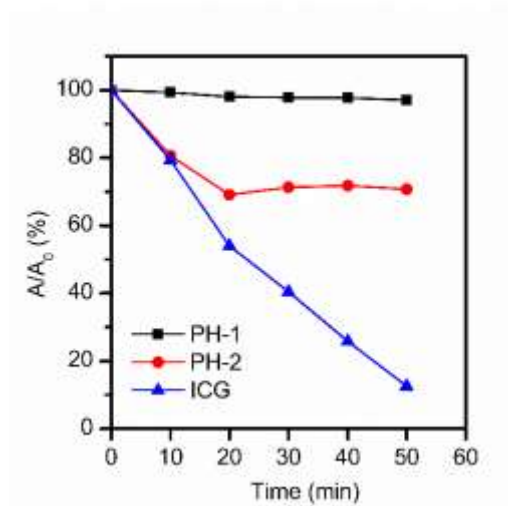

Fig. S1  $A/A_0$  of **PH-1**, **PH-2** and ICG exposed to white light for different time.

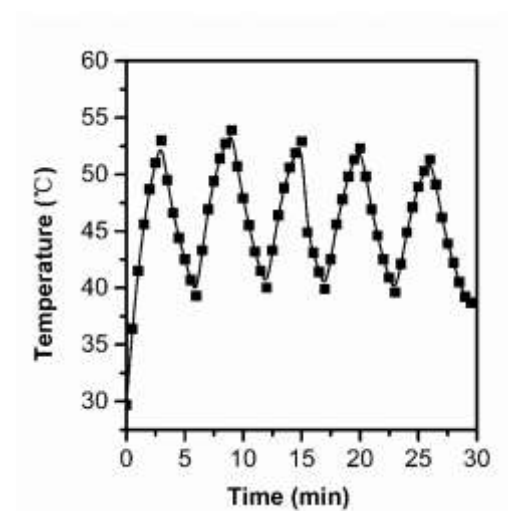

Fig. S2 Photothermal stability of **PH-1@HSA** in PBS buffer (pH = 7.4).

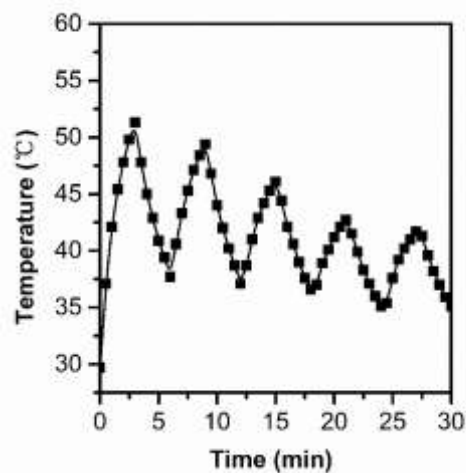

Fig. S3 Photothermal stability of **PH-2@HSA** in PBS buffer (pH = 7.4).

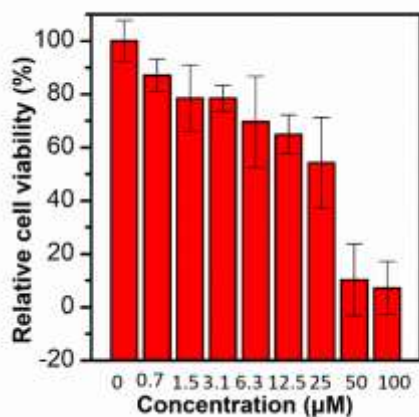

Fig. S4 Relative cell viability of **PH-1@HSA** (inhabited for 48 h with different concentration).

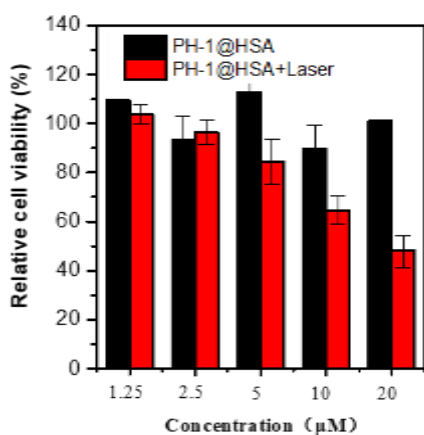

Fig. S5 Relative cell viability of **PH-1@HSA** with or without laser (the black is NPs only, the red is NPs with 808 nm laser).

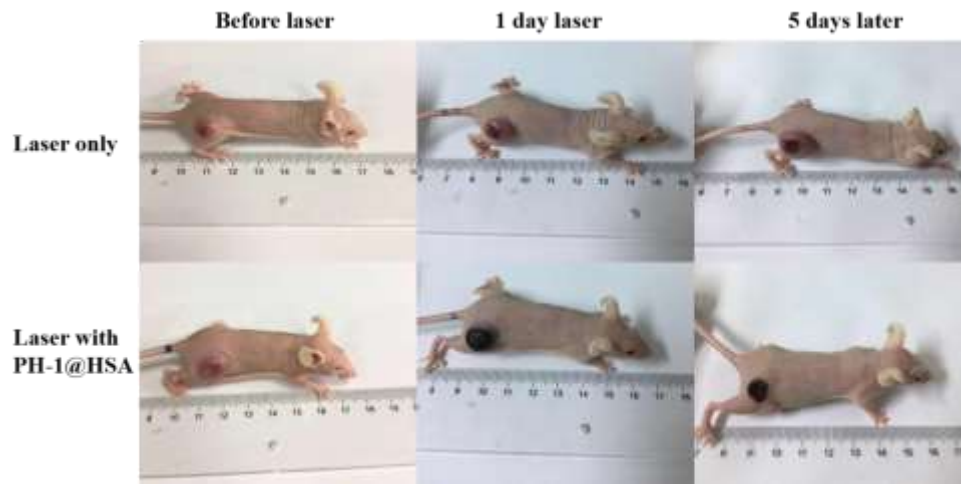

Fig. S6 The daylight images of mice before and after PTT.

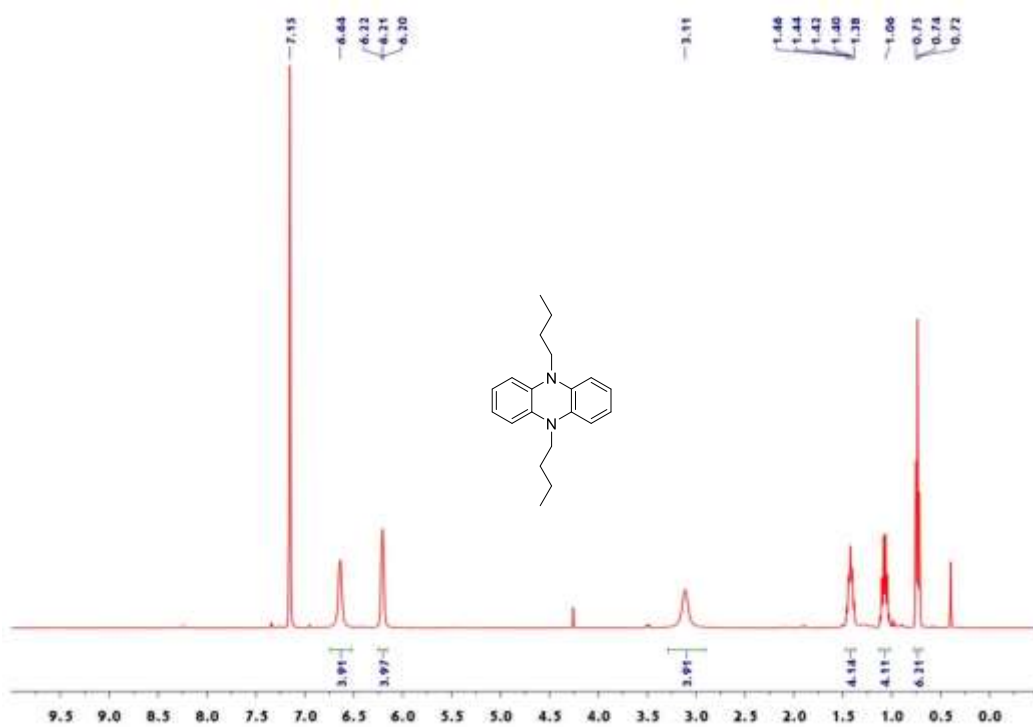

Fig. S7  $^1\text{H}$  NMR spectrum of compound 2 in chloroform-*d*

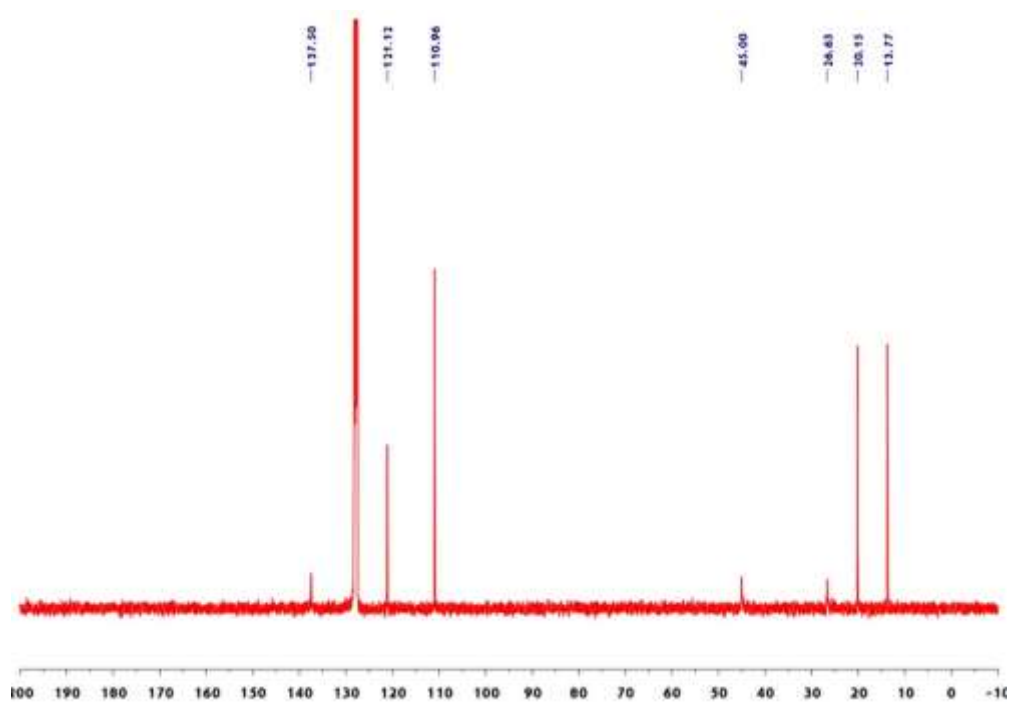

Fig. S8  $^{13}\text{C}$  NMR spectrum of compound 2 in chloroform-*d*

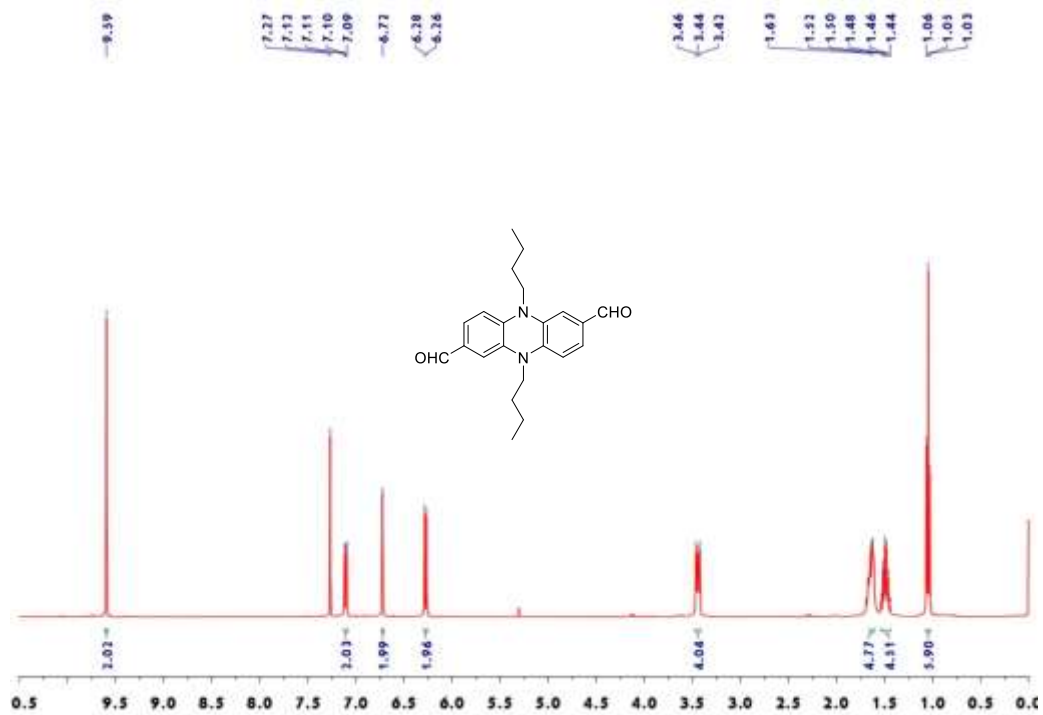

Fig. S9  $^1\text{H}$  NMR spectrum of **PH-CHO** in chloroform-*d*

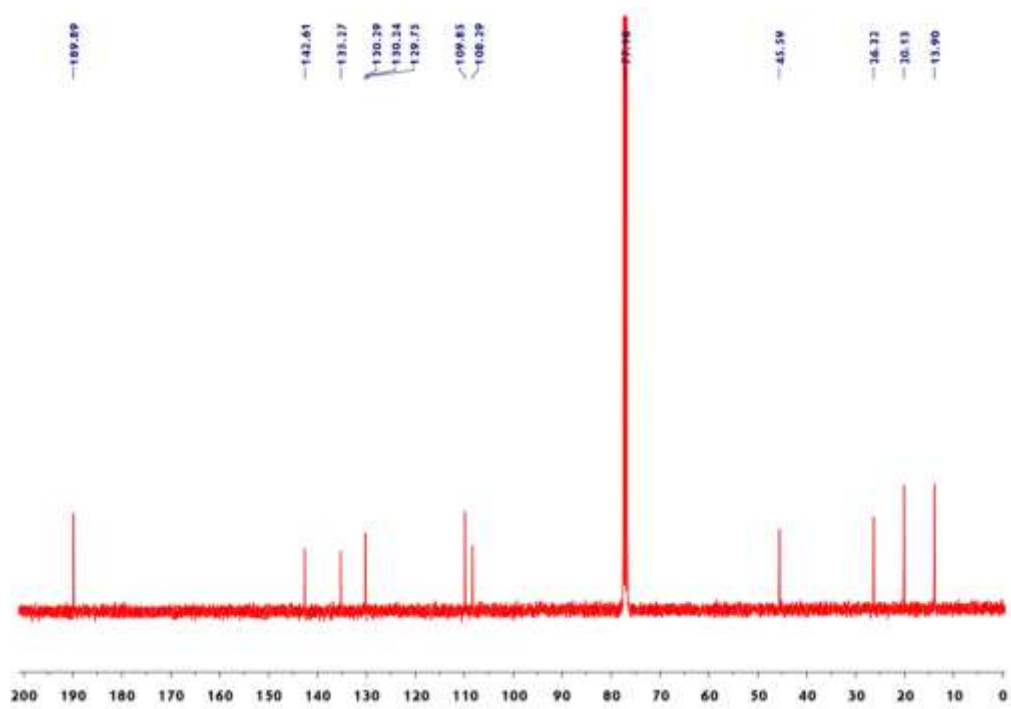

Fig. S10  $^{13}\text{C}$  NMR spectrum of **PH-CHO** in chloroform-*d*

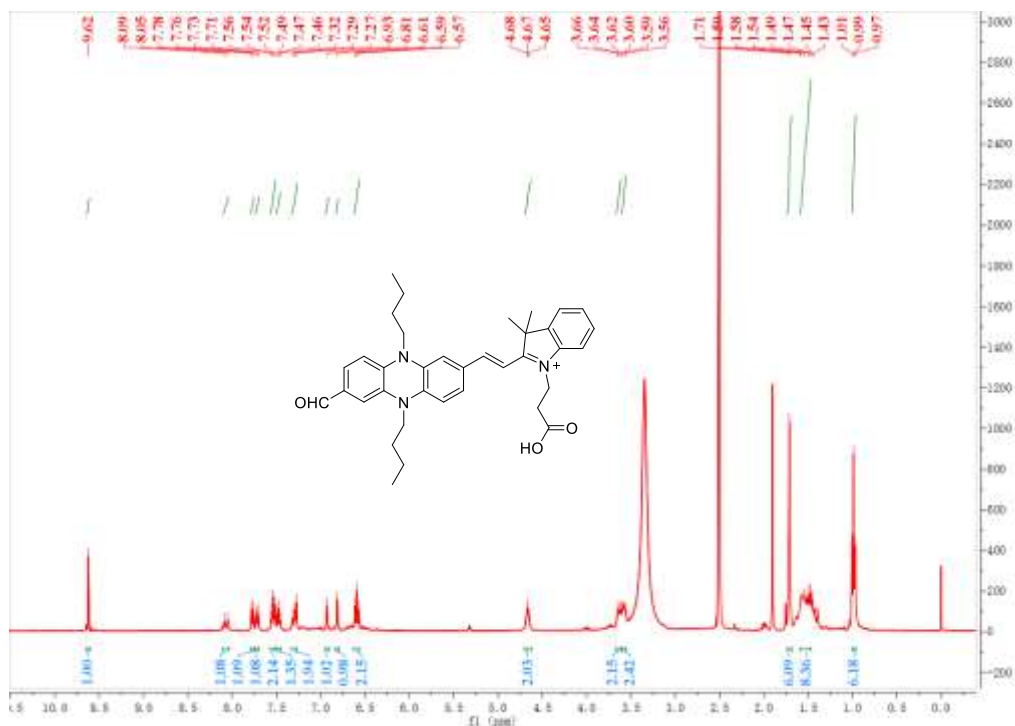

Fig. S11  $^1\text{H}$  NMR spectrum of **PH-1** in  $\text{DMSO-}d_6$

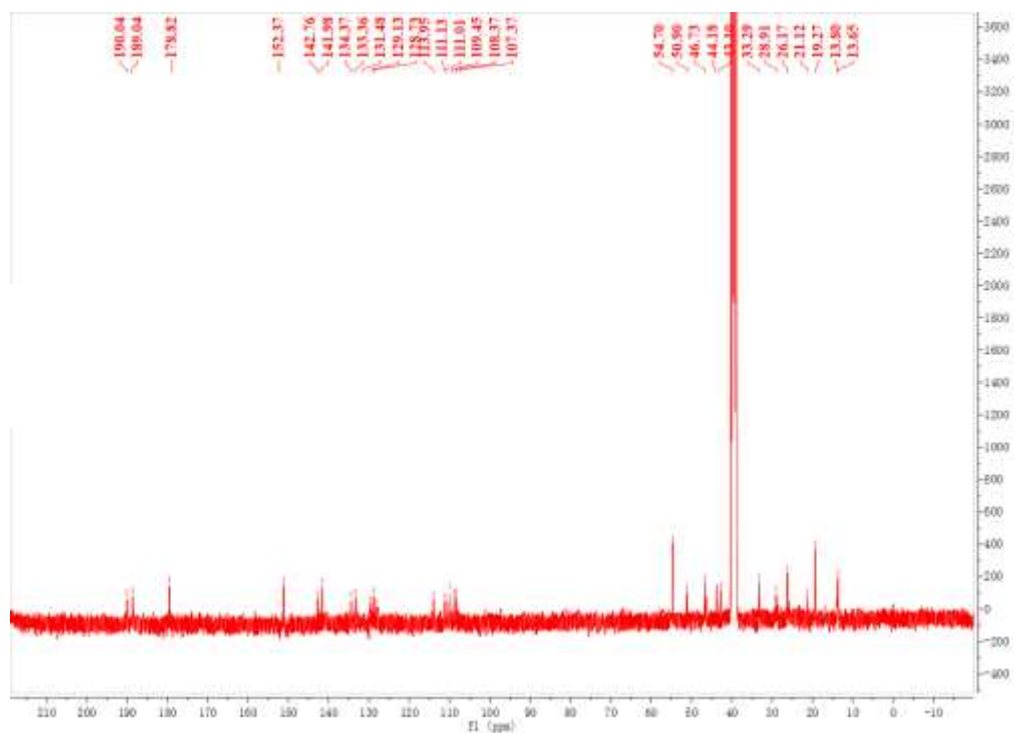

Fig. S12  $^{13}\text{C}$  NMR spectrum of **PH-1** in  $\text{DMSO-}d_6$

## Elemental Composition Report

Page 1

### Single Mass Analysis

Tolerance = 5.0 mDa / DBE: min = -1.5, max = 50.0

Element prediction: Off

Number of isotope peaks used for i-FIT = 3

Monoisotopic Mass, Even Electron Ions

17 formula(e) evaluated with 1 results within limits (up to 50 best isotopic matches for each mass)

Elements Used:

C: 0-36 H: 0-42 N: 0-3 O: 0-3 Na: 0-1

JL-HUA

HL-YYC-003 185 (2.112) Cm (185)

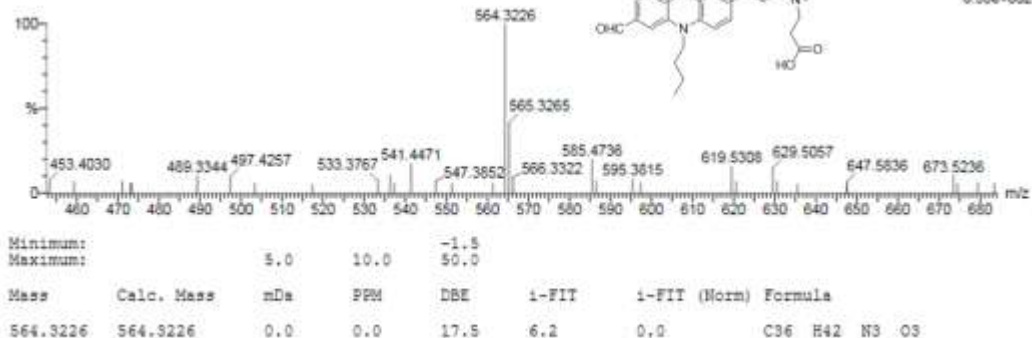

Fig. S13 High resolution mass spectrum of **PH-1**

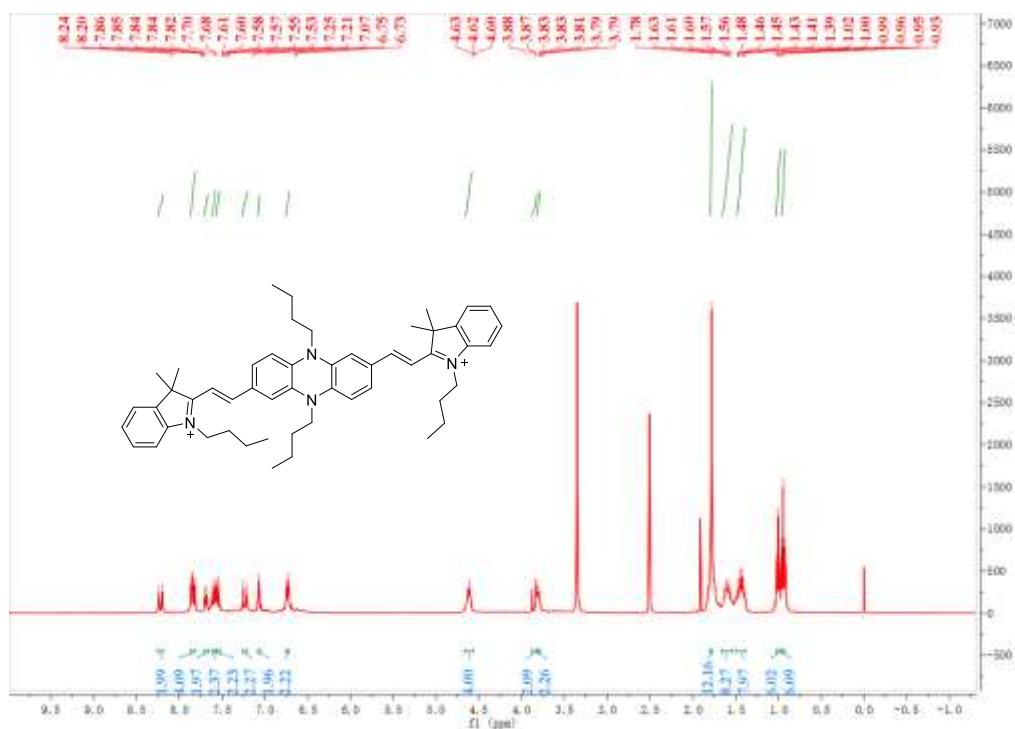

Fig. S14 <sup>1</sup>H NMR spectrum of **PH-2** in DMSO-*d*<sub>6</sub>



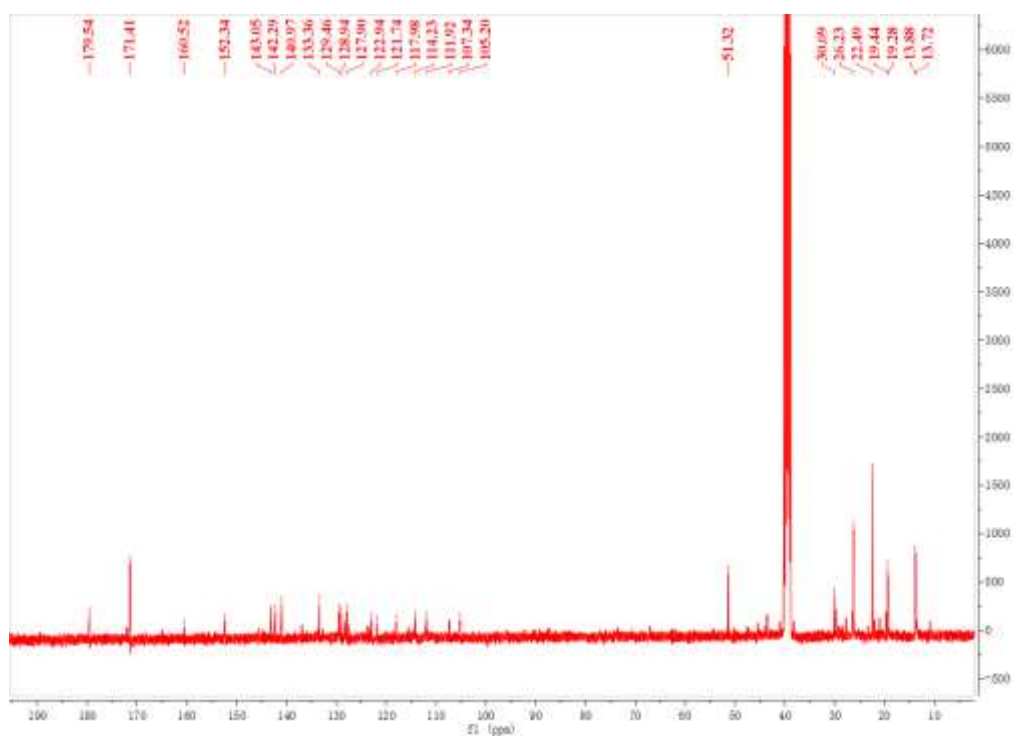

Fig. S15  $^{13}\text{C}$  NMR spectrum of **PH-2** in  $\text{DMSO-}d_6$

Elemental Composition Report

Single Mass Analysis

Tolerance = 5.0 mDa / DBE: min = -1.5, max = 50.0

Element prediction: Off

Number of isotope peaks used for i-FIT = 3

Monoisotopic Mass, Even Electron Ions

4 formula(e) evaluated with 1 results within limits (up to 50 best isotopic matches for each mass)

Elements Used:

C: 0-26 H: 0-33 N: 0-2 Na: 0-1

JL-HJA

HL-YYC-004 141 (1.604) Cm (141)

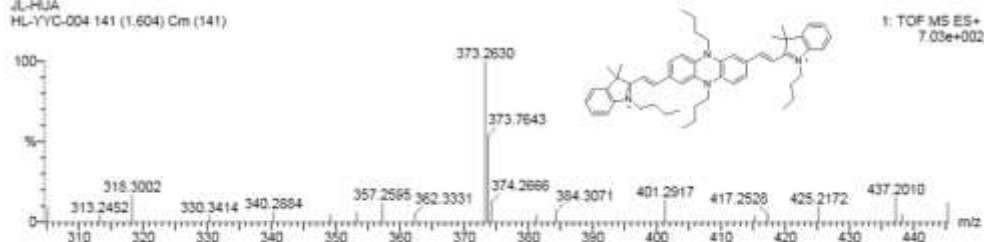

Minimum:

Maximum: 5.0 10.0 -1.5 50.0

| Mass     | Calc. Mass | mDa  | PPM  | DBE  | i-FIT | i-FIT (Norm) | Formula                                        |
|----------|------------|------|------|------|-------|--------------|------------------------------------------------|
| 373.2630 | 373.2644   | -1.4 | -3.8 | 11.5 | 29.6  | 0.0          | C <sub>26</sub> H <sub>33</sub> N <sub>2</sub> |

Fig. S16 High resolution mass spectrum of **PH-2**
